# Supplementary material
Source: PubMed Central journal article supplement (PMC2858907)
Supplement: supp_137.3.487_DEV039800TableS1.pdf [file supp_137.3.487_DEV039800TableS1.pdf]

**Table S1. RT-PCR primer sequences used in this study**

|               | Forward Primer        | Reverse Primer        |
|---------------|-----------------------|-----------------------|
| Beta-actin    | CCTGTCAGCAATGCCTGGGT  | CCAGCCTTCCTTCTTGGGTA  |
| <i>Gapdh</i>  | GGGTGTGAACCACGAGAAAT  | CCTTCCACAATGCCAAAGTT  |
| <i>Ptc1</i>   | CTGGGAGGAAATGCTGAATA  | GTTTTCCAGTGGCATTCTTG  |
| <i>Smo</i>    | GTTTCGTGGTCCTCACCTATG | TCACGGAGTCTCCATCTACC  |
| <i>Gli1</i>   | GTTATGGAGCAGCCAGAGAG  | GAGTTGATGAAAGCCACCAG  |
| <i>Gli3</i>   | ACACAGCCCTCCTCTCATC   | CATCAGGCTTGATCTTGGAC  |
| cyclin D1     | CGCCCTCCGTATCTTACTTC  | CTCTTCTTCAAGGGCTCCA   |
| <i>Nkx2.1</i> | GAAAGACAGCATCAGCTTCC  | CCATGCCCACTTTCTTGTAG  |
| sprouty 2     | AGAAGAGGATTCAAGGGAGA  | AGACAAGACGTGTACCTGCT  |
| <i>Etv5</i>   | GGTTAGCTGAAGCACAAGTT  | TTGTAGAGGCACTTTTCTCC  |
| <i>Mash1</i>  | CTGGACTTTACCAACTGGTTC | ATGCAGAGACACTGTTGGAG  |
| <i>Dlx2</i>   | CCTCAACAATGTCTCCTACTC | CTGGAAACTGGAGTAGATGGT |
